# Supplementary material for: Micromanipulation of prophase I chromosomes from mouse spermatocytes reveals high stiffness and gel-like chromatin organization
Source: PubMed Central journal article supplement (PMC7528058; doi:10.1038/s42003-020-01265-w), 2020-09-30
Supplement: 42003_2020_1265_MOESM2_ESM.pdf [file 42003_2020_1265_MOESM2_ESM.pdf]

## **Description of Additional Supplementary Files**

File Name: Supplementary Data 1

Description: This spreadsheet contains the numerical data used to generate all of the data figures in the paper. Each page in the spreadsheet contains the data for one figure, as indicated.
